# Supplementary material for: Anti-tumor effect of volatile oil from Houttuynia cordata Thunb. on HepG2 cells and HepG2 tumor-bearing mice
Source: Royal Society of Chemistry journal article supplement (doi:10.1039/c9ra06024c), 2019-01-01
Supplement: c9ra06024c2.pdf [file c9ra06024c2.pdf]

# MTT Raw data

|            |        |          |          |          |          |          |         |          |          |
|------------|--------|----------|----------|----------|----------|----------|---------|----------|----------|
| HepG2 48h  |        |          |          |          |          |          |         |          |          |
|            | C      | 100      | 200      | 300      | 400      | 500      |         |          |          |
|            | 0.6814 | 0.6029   | 0.5159   | 0.4792   | 0.3538   | 0.2831   |         |          |          |
|            | 0.778  | 0.6603   | 0.512    | 0.4754   | 0.4538   | 0.2982   |         |          |          |
|            | 0.7074 | 0.5293   | 0.4611   | 0.4398   | 0.3995   | 0.303    |         |          |          |
|            |        |          |          |          |          |          |         |          |          |
|            | 1      | 0.884796 | 0.757118 | 0.703258 | 0.519225 | 0.415468 |         |          |          |
|            | 1      | 0.848715 | 0.658098 | 0.611054 | 0.58329  | 0.38329  |         |          |          |
|            | 1      | 0.748233 | 0.651824 | 0.621713 | 0.564744 | 0.428329 |         |          |          |
|            |        |          |          |          |          |          |         | AVERAGE  | STDEV. S |
|            |        |          |          |          |          |          | IC50    |          |          |
|            | 100    | 88.4796  | 75.71177 | 70.3258  | 51.92251 | 41.54682 | 435.219 |          |          |
|            | 100    | 84.87147 | 65.80977 | 61.1054  | 58.32905 | 38.32905 | 411.337 | 436.543  | 25.8934  |
|            | 100    | 74.8233  | 65.18236 | 62.17133 | 56.47441 | 42.83291 | 463.073 |          |          |
| SKOV-3 48h |        |          |          |          |          |          |         |          |          |
|            | C      | 100      | 200      | 300      | 400      | 500      |         |          |          |
|            | 0.6725 | 0.5523   | 0.4783   | 0.3567   | 0.3016   | 0.2021   |         |          |          |
|            | 0.7855 | 0.639    | 0.5442   | 0.3998   | 0.2884   | 0.2142   |         |          |          |
|            | 0.6789 | 0.5866   | 0.4801   | 0.3685   | 0.2693   | 0.2311   |         |          |          |
|            |        |          |          |          |          |          |         |          |          |
|            | 1      | 0.821264 | 0.711227 | 0.530409 | 0.448476 | 0.30052  |         |          |          |
|            | 1      | 0.813495 | 0.692807 | 0.508975 | 0.367155 | 0.272693 |         |          |          |
|            | 1      | 0.864045 | 0.707173 | 0.54279  | 0.396671 | 0.340404 |         |          |          |
|            |        |          |          |          |          |          |         | AVERAGE  | STDEV. S |
|            |        |          |          |          |          |          | IC50    |          |          |
|            | 100    | 82.12639 | 71.12268 | 53.04089 | 44.84758 | 30.05204 | 322.851 |          |          |
|            | 100    | 81.34946 | 69.28071 | 50.89752 | 36.71547 | 27.26926 | 291.662 | 313.8687 | 19.34814 |
|            | 100    | 86.40448 | 70.71734 | 54.27898 | 39.66711 | 34.04036 | 327.093 |          |          |
| A2780 48h  |        |          |          |          |          |          |         |          |          |
|            | C      | 100      | 200      | 300      | 400      | 500      |         |          |          |
|            | 1.0226 | 0.906    | 0.7782   | 0.5607   | 0.4291   | 0.3524   |         |          |          |
|            | 1.0641 | 0.9069   | 0.8958   | 0.6028   | 0.4344   | 0.3529   |         |          |          |
|            | 0.9995 | 0.8848   | 0.8764   | 0.6075   | 0.4449   | 0.3123   |         |          |          |
|            |        |          |          |          |          |          |         |          |          |
|            | 1      | 0.885977 | 0.761001 | 0.548308 | 0.419617 | 0.344612 |         |          |          |
|            | 1      | 0.85227  | 0.841838 | 0.566488 | 0.408232 | 0.331642 |         |          |          |
|            | 1      | 0.885243 | 0.876838 | 0.607804 | 0.445123 | 0.312456 |         |          |          |
|            |        |          |          |          |          |          |         | AVERAGE  | STDEV. S |
|            |        |          |          |          |          |          | IC50    |          |          |
|            | 100    | 88.59769 | 76.10014 | 54.83082 | 41.96167 | 34.46118 | 344.271 |          |          |
|            | 100    | 85.22695 | 84.18382 | 56.64881 | 40.82323 | 33.16418 | 351.444 | 354.6067 | 12.2277  |
|            | 100    | 88.52426 | 87.68384 | 60.78039 | 44.51226 | 31.24562 | 368.105 |          |          |
| MCF-7 48h  |        |          |          |          |          |          |         |          |          |
|            | C      | 50       | 100      | 150      | 200      | 250      |         |          |          |
|            | 0.9701 | 0.8275   | 0.7391   | 0.6365   | 0.3304   | 0.144    |         |          |          |
|            | 0.8862 | 0.7892   | 0.6866   | 0.5087   | 0.3098   | 0.1141   |         |          |          |
|            | 0.9495 | 0.796    | 0.7328   | 0.5284   | 0.2777   | 0.1062   |         |          |          |
|            |        |          |          |          |          |          |         |          |          |
|            | 1      | 0.853005 | 0.76188  | 0.656118 | 0.340583 | 0.148438 |         |          |          |
|            | 1      | 0.890544 | 0.774769 | 0.574024 | 0.349582 | 0.128752 |         |          |          |
|            | 1      | 0.838336 | 0.771775 | 0.556503 | 0.29247  | 0.111848 |         |          |          |
|            |        |          |          |          |          |          |         | AVERAGE  | STDEV. S |
|            |        |          |          |          |          |          | IC50    |          |          |
|            | 100    | 85.30048 | 76.18802 | 65.61179 | 34.05834 | 14.84383 | 152.946 |          |          |
|            | 100    | 89.05439 | 77.47687 | 57.40239 | 34.95825 | 12.8752  | 149.913 | 147.5873 | 6.825431 |
|            | 100    | 83.8336  | 77.17746 | 55.65034 | 29.24697 | 11.18483 | 139.903 |          |          |

## RT-PCR Raw data

|     |         |          |          |          |
|-----|---------|----------|----------|----------|
|     |         | 1        |          |          |
|     | GADPH   | VEGF     | MMP9     | Bcl-2    |
| 0   | 16.757  | 21.546   | 21.124   | 18.511   |
| 200 | 16.964  | 21.157   | 19.759   | 16.689   |
| 300 | 16.472  | 19.5     | 15.454   | 11.074   |
|     |         |          |          |          |
| 0   | 1       | 1.285791 | 1.260608 | 1.104673 |
| 200 | 1       | 1.24717  | 1.164761 | 0.983789 |
| 300 | 1       | 1.183827 | 0.938198 | 0.672292 |
|     |         |          |          |          |
| 0   |         | 1        | 1        | 1        |
| 200 |         | 0.969964 | 0.923968 | 0.890571 |
| 300 |         | 0.920699 | 0.744243 | 0.60859  |
|     |         |          |          |          |
| 0   |         | 100      | 100      | 100      |
| 200 |         | 96.99636 | 92.39677 | 89.05708 |
| 300 |         | 92.06995 | 74.42429 | 60.85897 |
|     |         |          |          |          |
|     |         | 2        |          |          |
|     | GADPH   | VEGF     | MMP9     | Bcl-2    |
| 0   | 16.597  | 21.599   | 19.8289  | 21.03039 |
| 200 | 16.258  | 20.015   | 17.49089 | 17.88341 |
| 300 | 15.59   | 18.098   | 13.44504 | 11.47748 |
|     |         |          |          |          |
| 0   | 1       | 1.30138  | 1.194728 | 1.26712  |
| 200 | 1       | 1.231086 | 1.075833 | 1.099976 |
| 300 | 1       | 1.160872 | 0.862414 | 0.736208 |
|     |         |          |          |          |
| 0   |         | 1        | 1        | 1        |
| 200 |         | 0.945985 | 0.900484 | 0.868091 |
| 300 |         | 0.892032 | 0.72185  | 0.581009 |
|     |         |          |          |          |
| 0   |         | 100      | 100      | 100      |
| 200 |         | 94.59854 | 90.04835 | 86.80915 |
| 300 |         | 89.2032  | 72.185   | 58.10088 |
|     |         |          |          |          |
|     |         | 3        |          |          |
|     | GADPH   | VEGF     | MMP9     | Bcl-2    |
| 0   | 17.2579 | 21.8269  | 21.5297  | 19.80413 |
| 200 | 17.4149 | 20.8691  | 19.1938  | 17.43541 |
| 300 | 16.9874 | 19.1891  | 15.2704  | 11.5258  |
|     |         |          |          |          |
| 0   | 1       | 1.264748 | 1.247527 | 1.14754  |
| 200 | 1       | 1.198347 | 1.102148 | 1.001178 |
| 300 | 1       | 1.129608 | 0.898925 | 0.678491 |
|     |         |          |          |          |
| 0   |         | 1        | 1        | 1        |
| 200 |         | 0.947499 | 0.883466 | 0.872456 |
| 300 |         | 0.893148 | 0.720566 | 0.591257 |
|     |         |          |          |          |
| 0   |         | 100      | 100      | 100      |
| 200 |         | 94.74987 | 88.34662 | 87.24556 |
| 300 |         | 89.31483 | 72.05655 | 59.12571 |

Scratch Raw data

## Apopotosis Raw data

|      |       |       |       |      |      |
|------|-------|-------|-------|------|------|
| 0    | 100   | 200   | 300   | 400  | 500  |
| 5.07 | 5.84  | 14.95 | 19.88 | 45.1 | 60.6 |
| 7.35 | 14.31 | 16.06 | 19.74 | 46   | 58.3 |
| 6.1  | 12.85 | 15.42 | 19.1  | 43.7 | 54.2 |

CCCCCOC(=O)CC(S(=O)(=O)[O-])[Na+]

SNH

## EN140 Structural

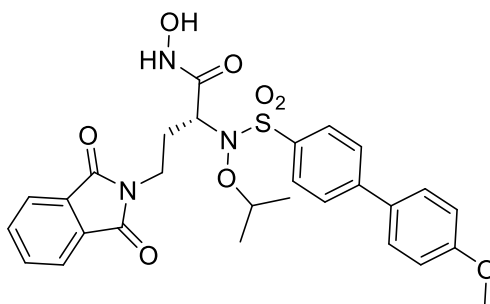

EN140

### Interaction and energy of SNH and MMP9

| ForcefieldBase | TopHits | -CDOCKER_ENERGY | -CDOCKER_INTERACTION_ENERGY | POSE_NUMBER |
|----------------|---------|-----------------|-----------------------------|-------------|
| CHARMm         |         |                 |                             |             |
|                | 6       | 55.1987         | 53.1878                     | 1           |
|                | 6       | 54.9668         | 54.9119                     | 2           |
|                | 6       | 52.3698         | 54.3461                     | 3           |
|                | 6       | 51.3626         | 50.4906                     | 4           |
|                | 6       | 51.1261         | 50.0855                     | 5           |
|                | 6       | 50.3972         | 47.6168                     | 6           |

Analysis of the Interaction Bond between Posture 2 and MMP9. Molecule in the figure represents SNH molecule.

- ☒ Molecule:Na21 - A:ASP185:OD2
- ☒ A:ALA191:HN - Molecule:O20
- ☒ A:HIS190:HA - Molecule:O20
- ☒ Molecule:H24 - A:ALA189:O
- ☒ Molecule:H25 - A:GLU227:OE2
- ☒ Molecule:C19 - A:LEU222
- ☒ Molecule:C19 - A:LEU243

### Report-EN140 Calculate Interaction Energy

| Name      | Forcefield       | Interaction Energy (kcal/mol) | VDW Interaction Energy (kcal/mol) | Electrostatic Interaction Energy (kcal/mol) |
|-----------|------------------|-------------------------------|-----------------------------------|---------------------------------------------|
| 4WZV_prep | 4WZV_prep-CHARMm | -90.6301423                   | -44.2597691                       | -46.3703732                                 |

### Report-SNH Calculate Interaction Energy

| Name        | Forcefield         | Interaction Energy (kcal/mol) | VDW Interaction Energy (kcal/mol) | Electrostatic Interaction Energy (kcal/mol) |
|-------------|--------------------|-------------------------------|-----------------------------------|---------------------------------------------|
| SNH_model_1 | SNH_model_1-CHARMm | -83.2091424                   | -40.6743099                       | -42.5348325                                 |

### Report-SNH Calculate Binding Energy

| Ligand Name | Binding Energy (kcal/mol) | Ligand Energy (kcal/mol) | Protein Energy (kcal/mol) | Complex Energy (kcal/mol) | Entropic Energy (kcal/mol) |
|-------------|---------------------------|--------------------------|---------------------------|---------------------------|----------------------------|
| Molecule    | -172.7831                 | -12.1012                 | -4723.1825                | -4908.0668                | 20.5935                    |

## High Performance Liquid Chromatography

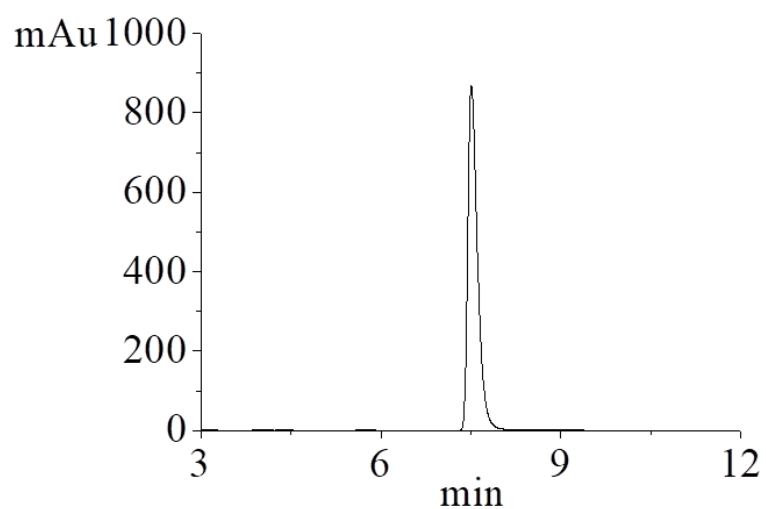

## *In vivo* experiment data

| n=5                    | PBS group | SNH treated group | Cyclophosphamide treated group |
|------------------------|-----------|-------------------|--------------------------------|
|                        |           | (300mg/kg)        | (25mg/kg)                      |
| 1                      | 1.545     | 0.718             | 0.138                          |
| 2                      | 1.476     | 0.759             | 0.374                          |
| 3                      | 0.953     | 0.401             | 0.149                          |
| 4                      | 0.906     | 0.527             | 0.157                          |
| 5                      | 1.427     | 0.699             | 0.279                          |
|                        |           |                   |                                |
|                        | 6.307     | 3.104             | 1.097                          |
|                        | 1.2614    | 0.6208            | 0.2194                         |
|                        |           |                   |                                |
| Tumor inhibitory rates |           | 0.507848422       | 0.826066276                    |
